# Supplementary material for: A novel transcriptome-derived SNPs array for tench (Tinca tinca L.)
Source: PLoS One. 2019 Mar 19;14(3):e0213992. doi: 10.1371/journal.pone.0213992 (PMC6424483; doi:10.1371/journal.pone.0213992)
Supplement: S6 Table — (XLSX) [file pone.0213992.s018.xlsx]

## Sheet: Sheet1
S6 Table. Back mapping of reads
Sample	Library	Mapped%
MW-330	1	0.9782
MW-389	1	0.9853
BW-330	1	0.9654
BW-389	1	0.9656
MWH-377	1	0.9938
MWT-240	1	0.9917
MWH-377	2	0.9923
MWT-240	2	0.9924
